# Supplementary material for: Ectopic Overexpression of Maize Heat Stress Transcription Factor ZmHsf05 Confers Drought Tolerance in Transgenic Rice
Source: MDPI journal article supplement (doi:10.3390/genes12101568), 2021-10-01
Supplement: s1 [file s1]

## Supplementary material for

*Heat Shock Transcription Factor05* of *Zea mays* L., a Key Drought-related Gene Involving Absciscic acid-dependent Pathway

**Table S1.** The sequence of primers used in this study

| Use                                  | Name            | Forward Primer (5'-3')                          | Reverse Primer (5'-3')                                |
|--------------------------------------|-----------------|-------------------------------------------------|-------------------------------------------------------|
| 1301a                                | <i>ZmHsf05</i>  | GGGGTACCATGAGC<br>CACGGGAACGGGAT                | GCTCTAGACTAATGTCT<br>GGGTCCATGTTGTTTC                 |
| 1305-GFP                             | <i>ZmHsf05</i>  | GCTCTAGAATGAGC<br>CACGGGAACGGGAT                | TCCCCCGGGATGTCTG<br>GGTCCATGTTGTTT                    |
| RT-qPCR                              | <i>ZmHsf05</i>  | GAGTGCCGCCAACA<br>ATA                           | CCACCTTTCTGAAGCC<br>ATA                               |
|                                      | <i>ZmActin1</i> | GGGATTGCCGATCG<br>TATGAG                        | GAGCCACCGATCCAGA<br>CACT                              |
| pGBKT7                               | <i>ZmHsf05</i>  | ATGGCCATGGAGGC<br>CGAATTCATGAGCC<br>ACGGGAACGGG | CCGCTGCAGGTCGACG<br>GATCCCTAATGTCTGGG<br>TCCATGTTGTTT |
| Semi-quantitative                    | <i>ZmHsf05</i>  | TCGCCGCCGTTTCCTT<br>ACCAA                       | CATATCCAAAGTGTCTCT<br>ACC                             |
|                                      | <i>OsActin</i>  | CTGACGGAGCGTGG<br>TTACTCAT                      | TGGTCTTGGCAGTCTC<br>CATTTC                            |
| ABA-related and stress-related genes | <i>OsLEA3</i>   | ATACCAAGGAGGCG<br>ACGAAGG                       | TCATCCCCAGCGTGCT<br>CATCA                             |
|                                      | <i>OsASR5</i>   | ACCACCTGTTCCAC<br>CACAAGA                       | TCTTCTCGTGGTGCTCG<br>TGGA                             |
|                                      | <i>OsNCED3</i>  | CGCAACAGTAAAAA<br>GAATTAACAGC                   | TATACACACACGCGGT<br>CGTT                              |
|                                      | <i>OsAP3</i>    | ACGTCCAGCAACGC<br>ATCCTTAC                      | TCATACGGTATCCAGC<br>CTCAGC                            |

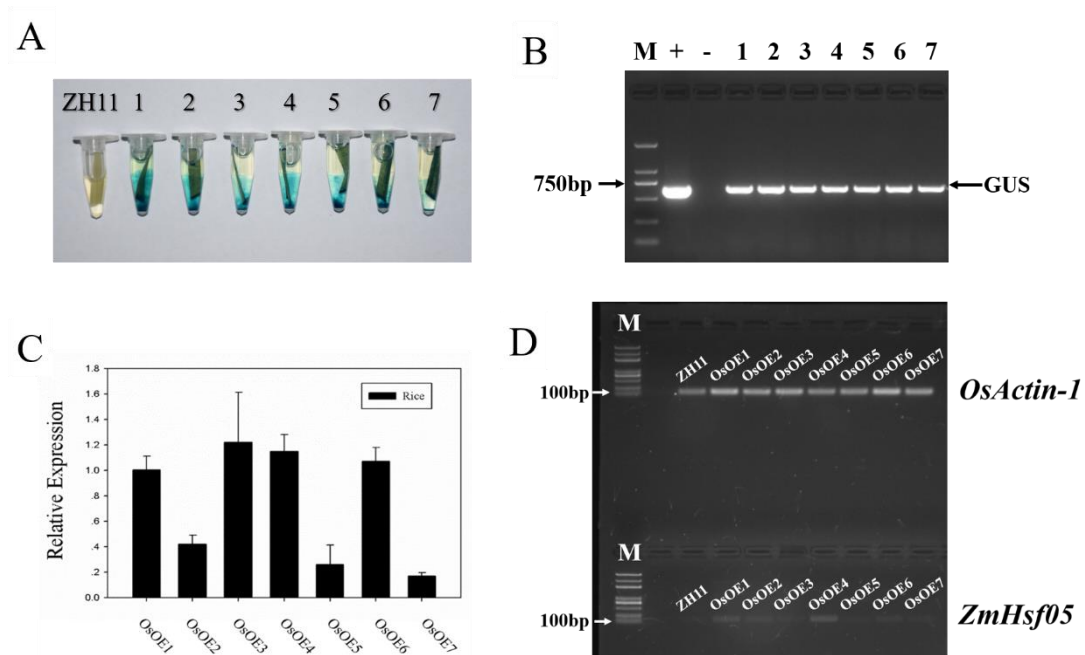

**Supplemental Figure S1.** Identification of positive transgenic rice seedlings overexpressing *ZmHsf05* gene. (A) GUS staining of transgenic rice leaves. (B) GUS gene PCR of transgenic rice. (C) Quantitative detection of *ZmHsf05* gene expression in transgenic rice. (D) Semi-quantitative detection of *ZmHsf05* gene expression in transgenic rice. The *OsActin-1* gene was used as the internal control for normalization. M stands for maker. Vertical bars indicate means  $\pm$  S.E. ( $n \geq 3$ ).
